# Supplementary material for: Motor cortex activity across movement speeds is predicted by network-level strategies for generating muscle activity
Source: eLife journal article supplement (doi:10.7554/elife.67620), 2022-05-27
Supplement: supp [file elife-67620-supp-v1.zip]

Archive with 9 entries (9 files):
- elife_poa_e67620_Transparent_Reporting_File.docx
- elife_poa_e67620_Figure_3_figure_supplement_1.pdf
- elife_poa_e67620_Figure_3_figure_supplement_2.pdf
- elife_poa_e67620_Figure_4_figure_supplement_1.pdf
- elife_poa_e67620_Figure_6_figure_supplement_1.pdf
- elife_poa_e67620_Figure_7_figure_supplement_1.pdf
- elife_poa_e67620_Figure_8_figure_supplement_1.pdf
- elife_poa_e67620_Figure_8_figure_supplement_2.pdf
- elife_poa_e67620_Figure_9_figure_supplement_1.pdf
