# Supplementary material for: Motor cortex activity across movement speeds is predicted by network-level strategies for generating muscle activity
Source: eLife journal article supplement (doi:10.7554/elife.67620), 2022-05-27

**Figure 9 - figure supplement 1**

**a** Monkey C forward

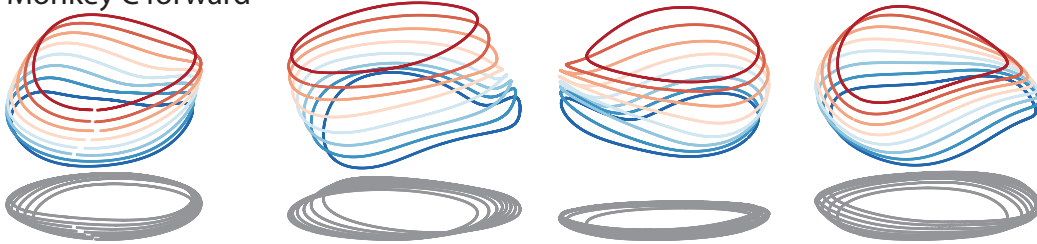

Monkey C backward

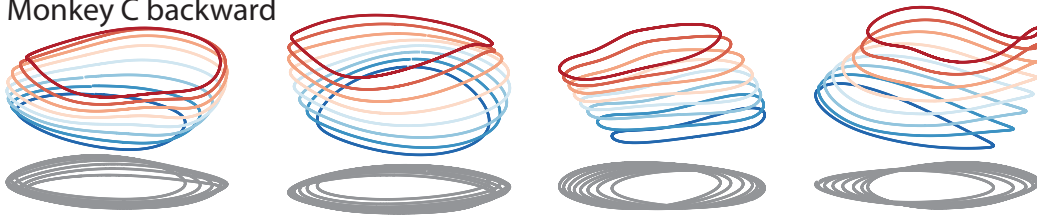

**b** Monkey D forward

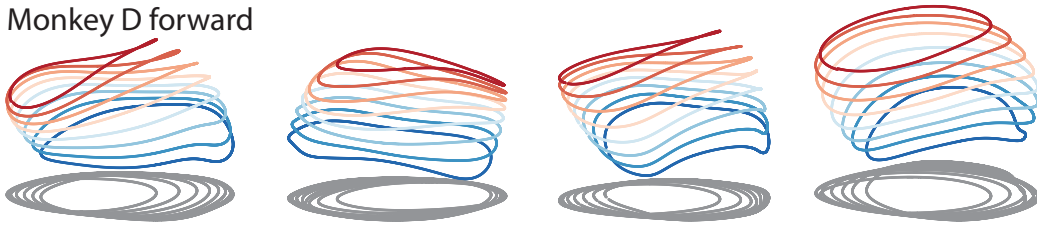

Monkey D backward

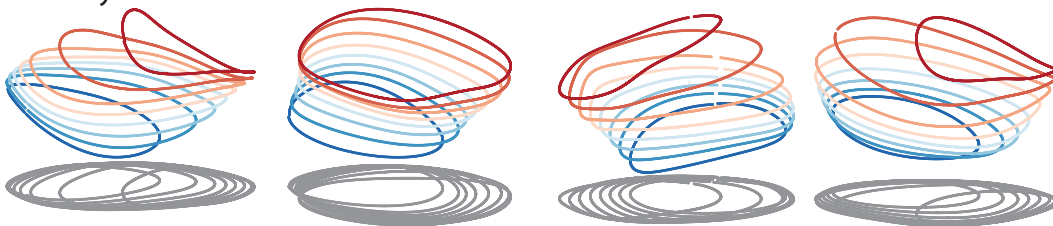

Supplement: supp [file elife-67620-supp-v1.zip › elife_poa_e67620_Figure_9_figure_supplement_1.pdf]
