# Supplementary figures and images for: Motor cortex activity across movement speeds is predicted by network-level strategies for generating muscle activity
Source: eLife journal article supplement (doi:10.7554/elife.67620), 2022-05-27

Figure 6 - figure supplement 1

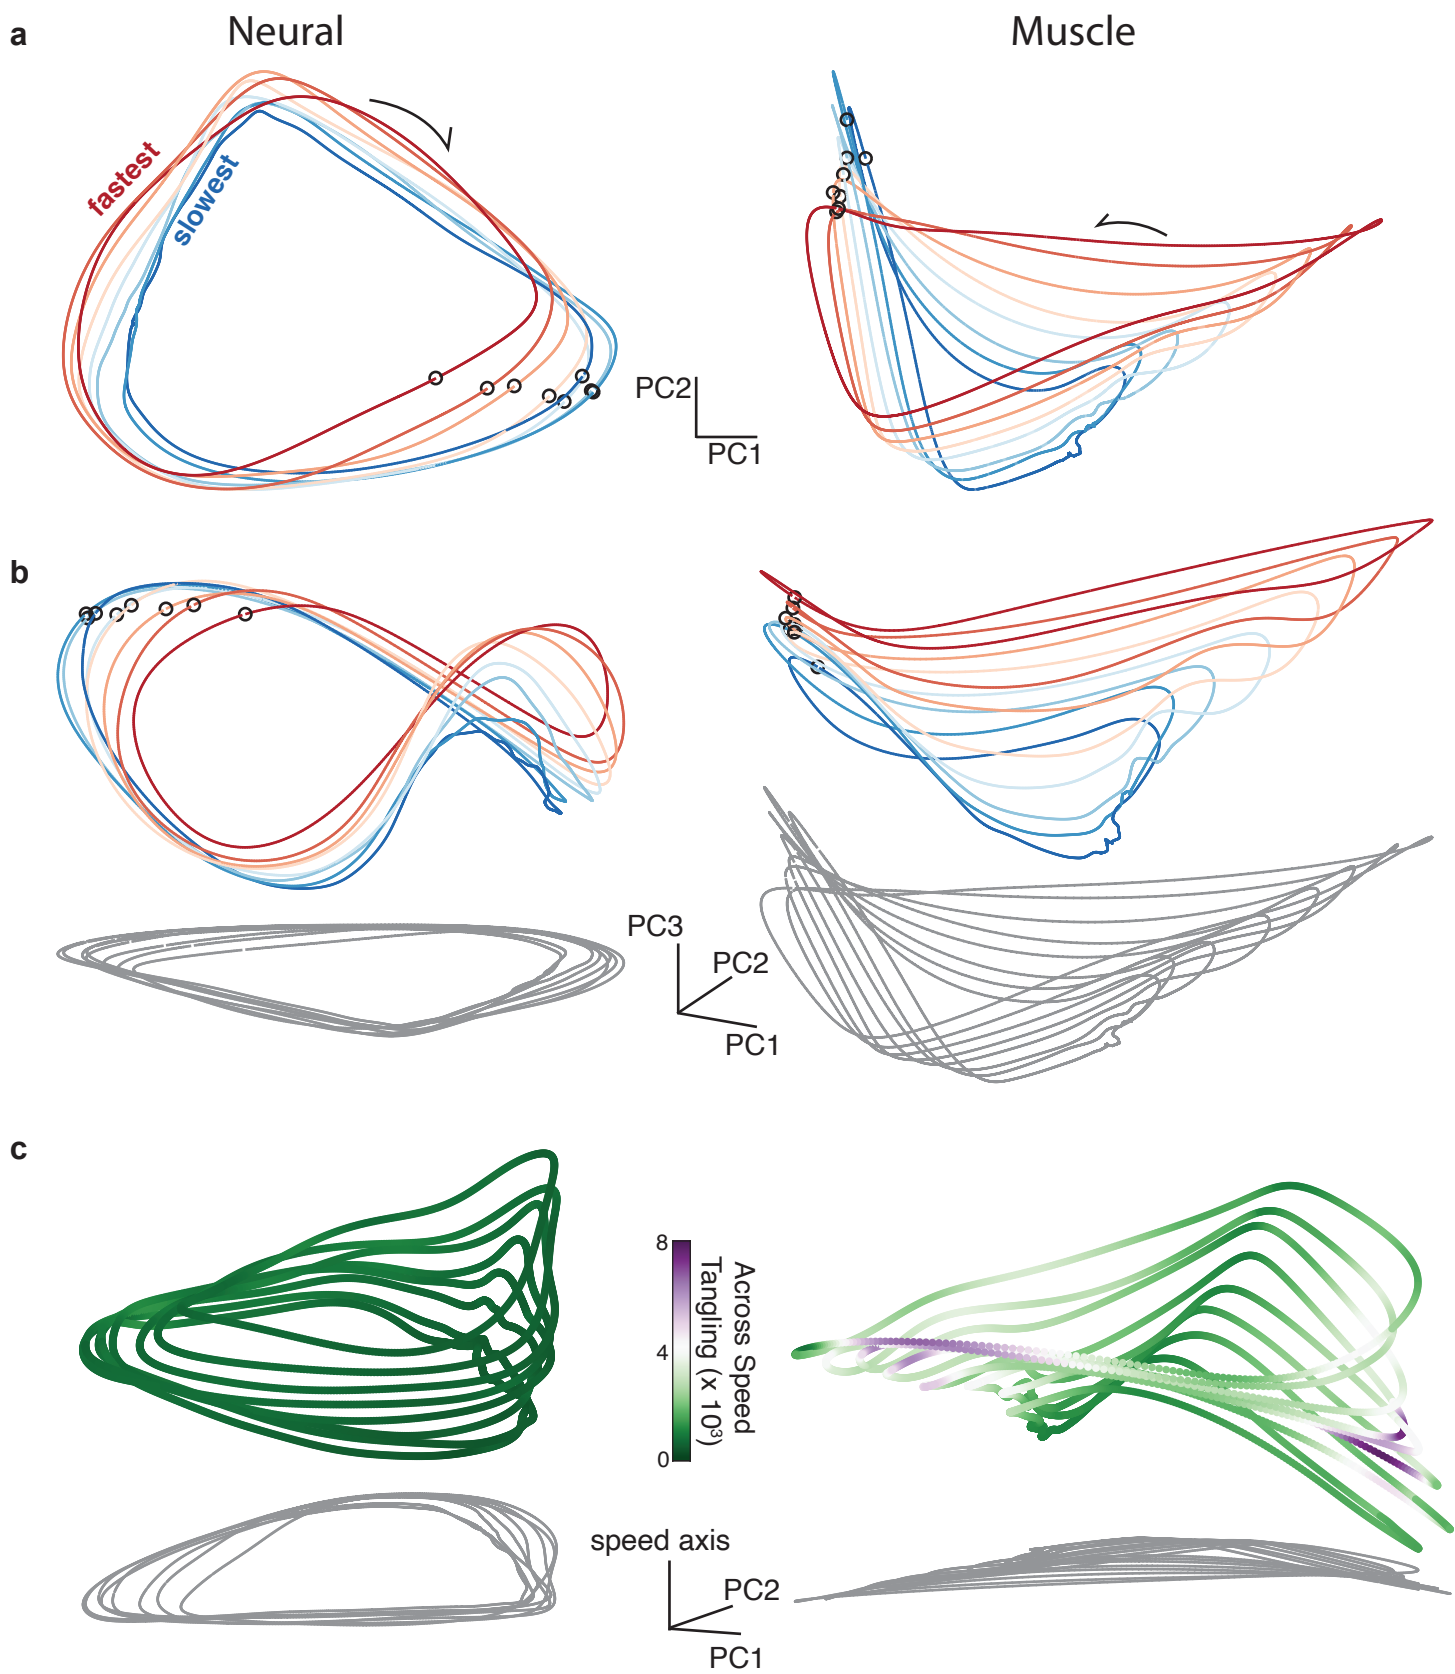

Supplement: supp [file elife-67620-supp-v1.zip]

Figure 7 - figure supplement 1

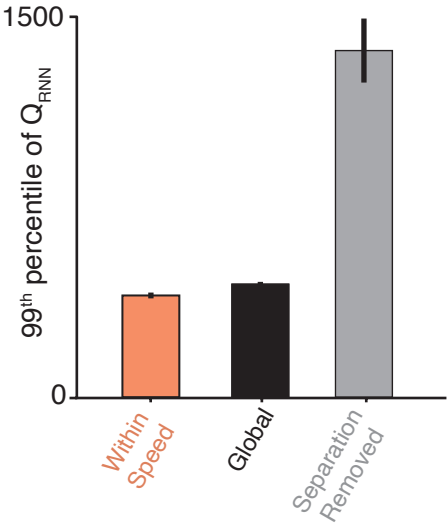

Supplement: supp [file elife-67620-supp-v1.zip]

Figure 3 - figure supplement 1

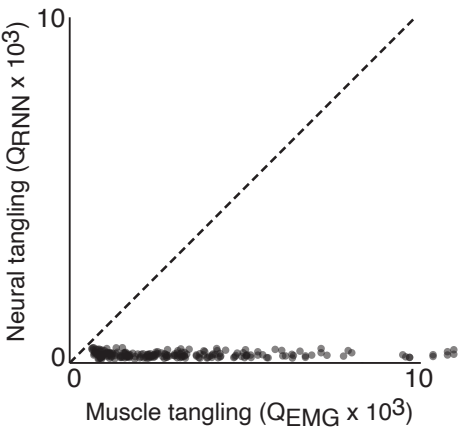

Supplement: supp [file elife-67620-supp-v1.zip]

Figure 8 - figure supplement 2

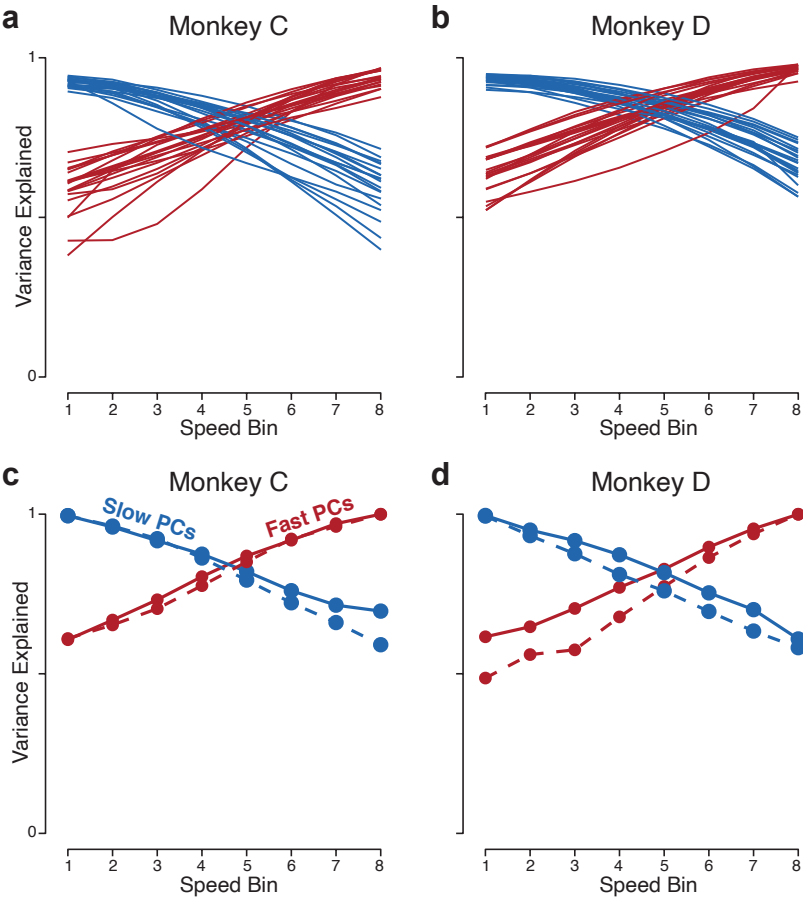

Supplement: supp [file elife-67620-supp-v1.zip]

Figure 4 - figure supplement 1

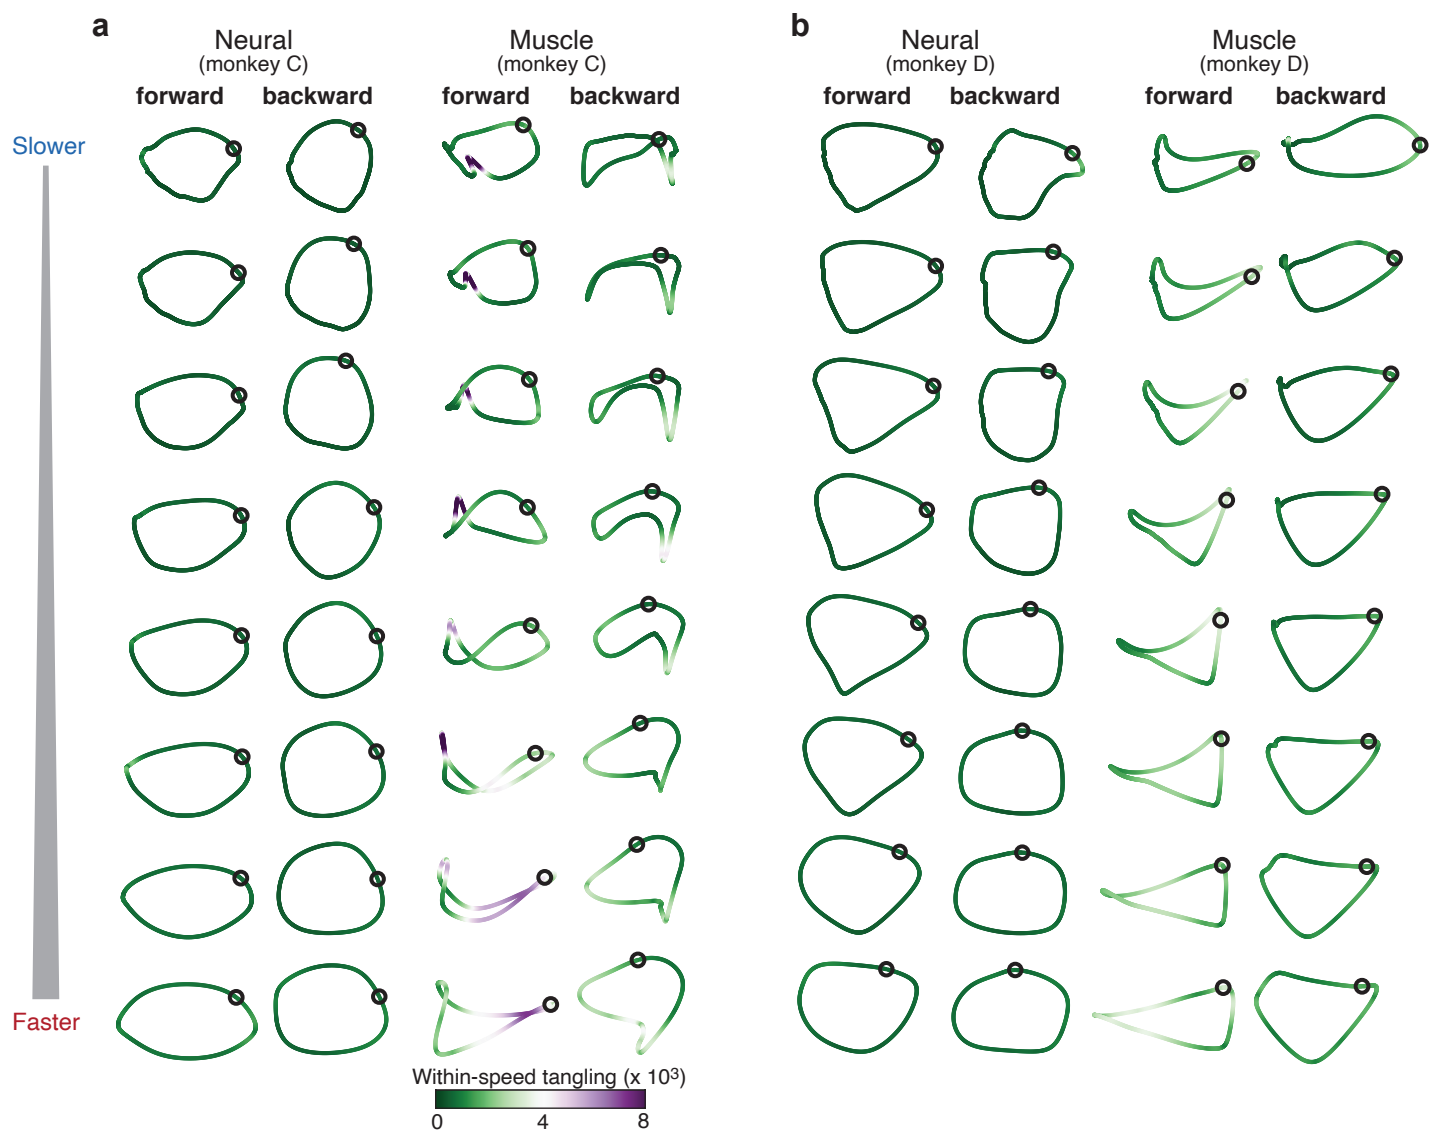

Supplement: supp [file elife-67620-supp-v1.zip]

Figure 3 - figure supplement 2

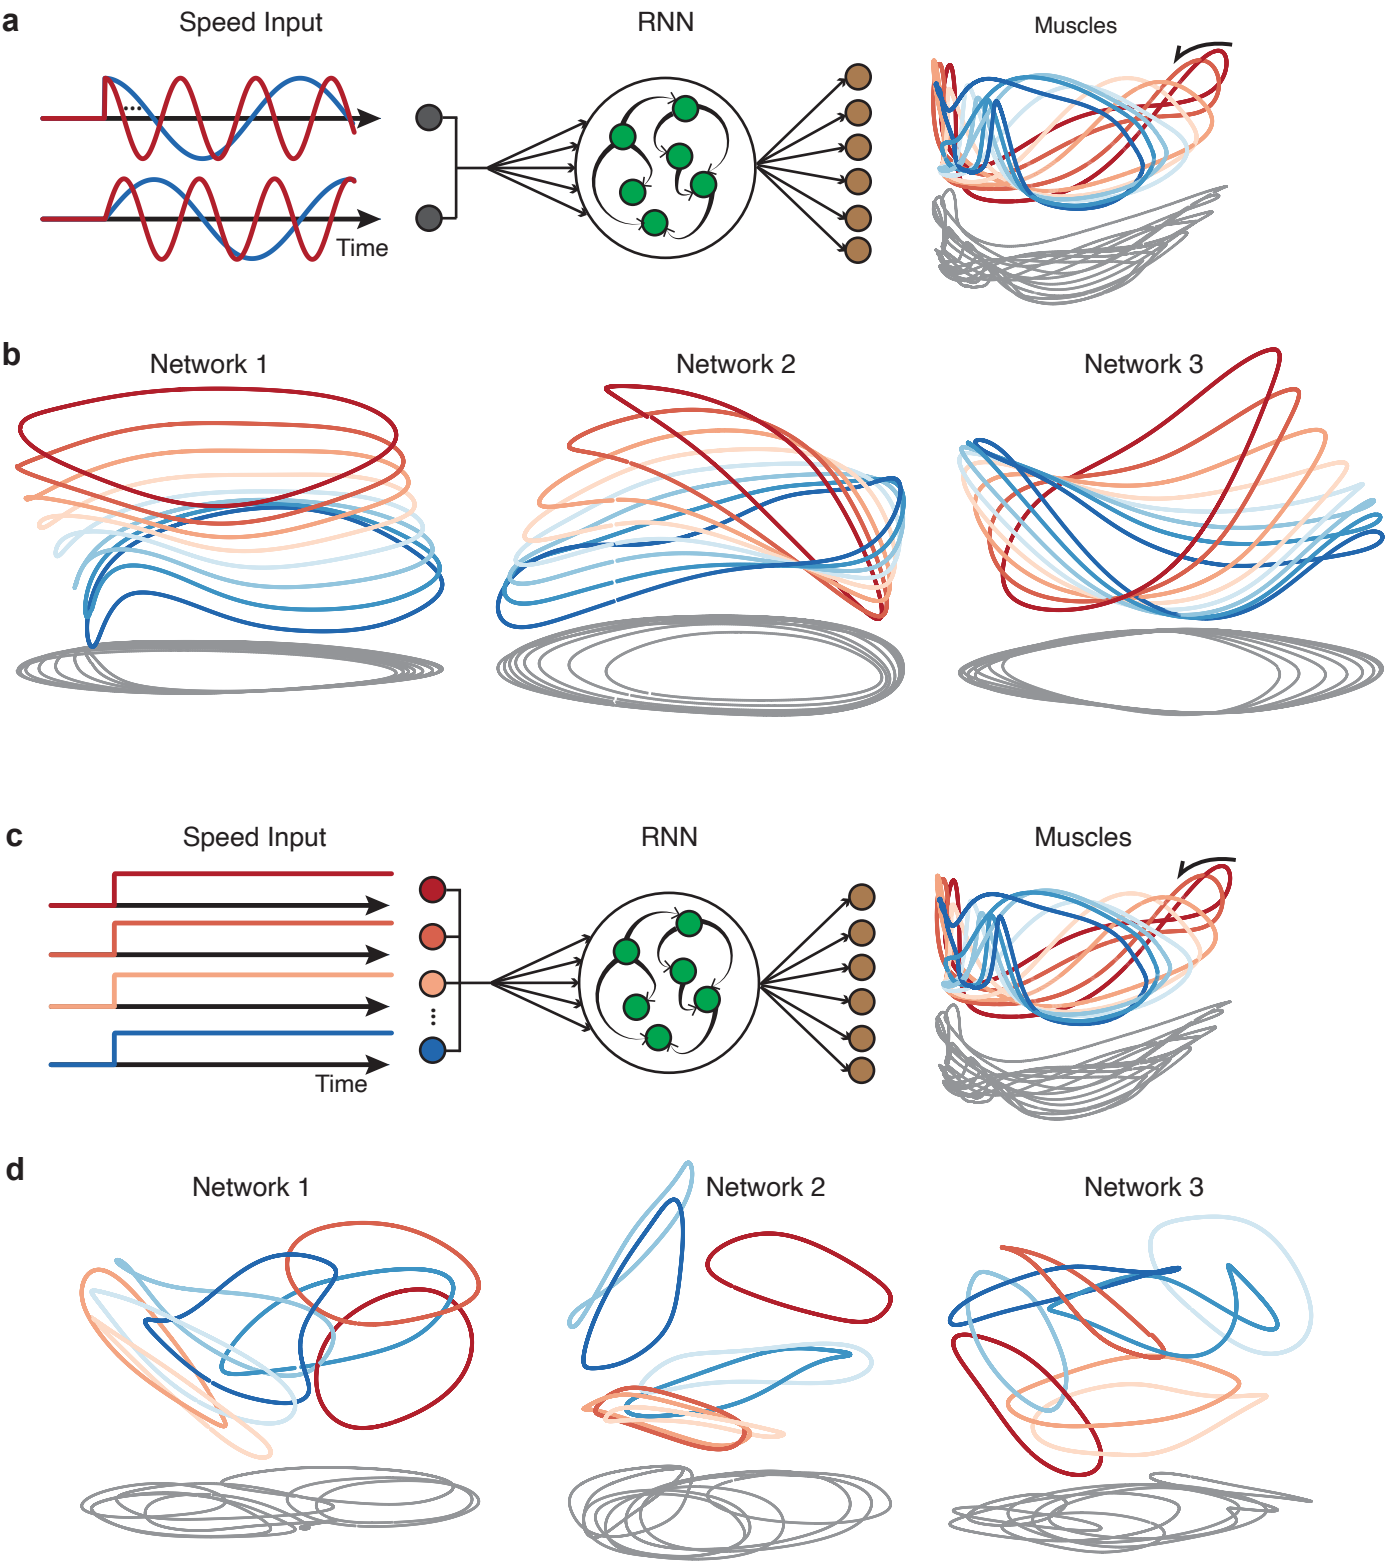

Supplement: supp [file elife-67620-supp-v1.zip › elife_poa_e67620_Figure_3_figure_supplement_2.pdf]

Figure 8 - figure supplement 1

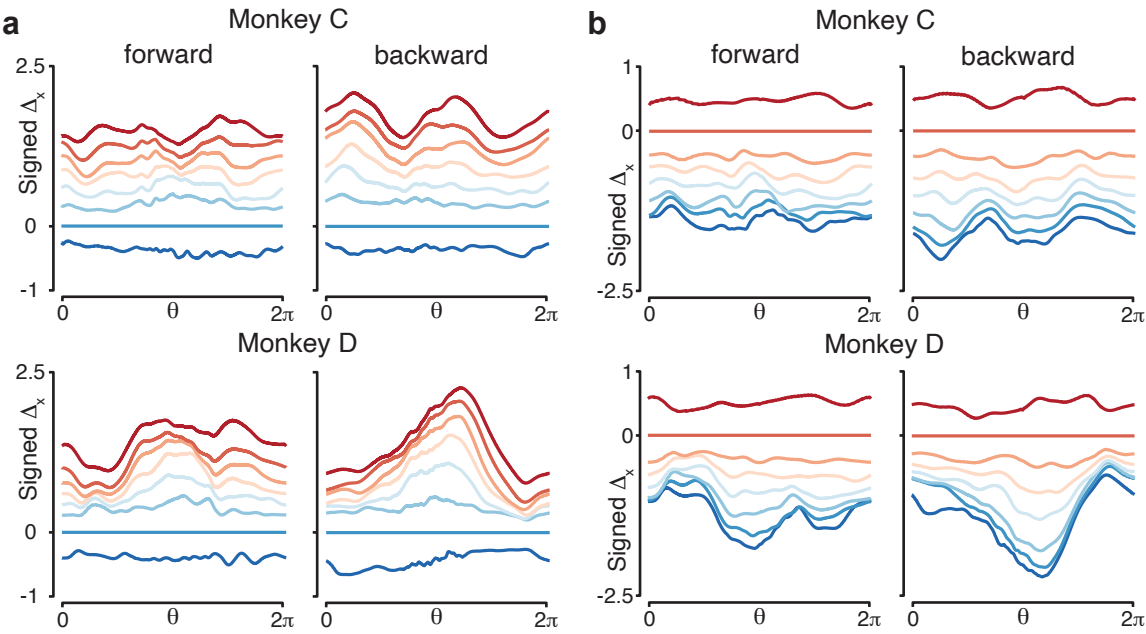

Supplement: supp [file elife-67620-supp-v1.zip › elife_poa_e67620_Figure_8_figure_supplement_1.pdf]
